# Supplementary material for: Allelic Variations in Phenology Genes of Eastern U.S. Soft Winter and Korean Winter Wheat and Their Associations with Heading Date
Source: MDPI journal article supplement (doi:10.3390/plants11223116), 2022-11-15
Supplement: s1 [file s1]

---

## Supplementary Materials for

Article

# Allelic Variations in Phenology Genes of Eastern U.S. Soft Winter and Korean Winter Wheat and Their Associations with Heading Date

Fengyun Ma <sup>1,2</sup>, Gina Brown-Guedira <sup>3</sup>, Moonseok Kang <sup>4</sup> and Byung-Kee Baik <sup>1,\*</sup>

1 United States Department of Agriculture (USDA), Agricultural Research Service (ARS)-CSWQRU, Soft Wheat Quality Laboratory, 1680 Madison Avenue, Wooster, OH 44691, USA

2 Department of Horticulture and Crop Science, The Ohio State University, 1680 Madison Avenue, Wooster, OH 44691, USA

3 United States Department of Agriculture (USDA), Agricultural Research Service (ARS), Eastern Regional Small Grains Genotyping Laboratory, Raleigh, NC 27695, USA

4 Rural Development Administration, National Institute of Crop Science, Suwon, Gyeonggi 16429, Korea

\* Correspondence: byungkee.baik@usda.gov

---

**Supplemental Table S1** Phenology gene profiles and heading dates of 149 eastern U.S. soft winter wheat genotypes grown in Wooster, Ohio, for four years and 32 Korean winter wheat varieties grown in Wooster, Ohio, for two years.

The genotyped loci include vernalization (*Vrn*) genes where ‘*w*’ indicates the winter allele, photoperiod (*Ppd*) genes where alleles are ‘*a*’ insensitive and ‘*b*’ sensitive, earliness per se (*Eps*) genes, reduced-height (*Rht*) genes where alleles are ‘*a*’ tall and ‘*b*’ semi-dwarf. Variation in winter alleles at vernalization loci include copy number variation (CNV) for *vrn-A1*, and Neuse-type (‘*N*’) or AGS2000-type (‘*A*’) alleles for *vrn-B1*. Missing heading data are indicated with a dash (-).

| Sample Name            | Class | <i>Vrn</i> loci          |                      |                           |                           |                           | <i>Ppd</i> loci |              |                | <i>Eps</i> loci             |                             | <i>Rht</i> loci |            | Heading date (day of the year) |      |      |      |
|------------------------|-------|--------------------------|----------------------|---------------------------|---------------------------|---------------------------|-----------------|--------------|----------------|-----------------------------|-----------------------------|-----------------|------------|--------------------------------|------|------|------|
|                        |       | <i>Vrn</i><br><i>-A1</i> | <i>vrn-A1</i><br>CNV | <i>Vrn</i> -<br><i>B1</i> | <i>vrn</i> -<br><i>B1</i> | <i>vrn</i> -<br><i>D3</i> | <i>A1</i>       | <i>B1</i>    | <i>D1</i>      | <i>TaELF</i><br><i>3-B1</i> | <i>TaELF</i><br><i>3-D1</i> | <i>B1</i>       | <i>D1</i>  | 2015                           | 2016 | 2017 | 2018 |
| U.S. soft winter wheat |       |                          |                      |                           |                           |                           |                 |              |                |                             |                             |                 |            |                                |      |      |      |
| Ackley                 | SRW   | <i>w</i>                 | >2                   | <i>w</i>                  | <i>N</i>                  | <i>a</i>                  | <i>b</i>        | <i>a-CS</i>  | <i>b</i>       | <i>a</i>                    | <i>b</i>                    | <i>b</i>        | <i>a</i>   | -                              | 140  | 129  | 140  |
| AG2581                 | SRW   | <i>w</i>                 | >2                   | <i>w</i>                  | <i>N</i>                  | <i>b</i>                  | <i>a.1</i>      | <i>null</i>  | <i>b</i>       | <i>a</i>                    | <i>a</i>                    | <i>b</i>        | <i>a</i>   | 142                            | 140  | 133  | 142  |
| AG99751                | SRW   | <i>w</i>                 | >2                   | <i>w</i>                  | <i>N</i>                  | <i>a</i>                  | <i>b</i>        | <i>a-CS</i>  | <i>a/b het</i> | <i>a</i>                    | <i>b</i>                    | <i>b</i>        | <i>a</i>   | 144                            | 140  | 135  | 144  |
| AgriMAXX 462           | SRW   | <i>w</i>                 | >2                   | <i>w</i>                  | <i>N</i>                  | <i>b</i>                  | <i>b</i>        | <i>a-S64</i> | <i>a</i>       | <i>a</i>                    | <i>a</i>                    | <i>a</i>        | <i>b</i>   | 144                            | 140  | 134  | 145  |
| AGS 2056               | SRW   | <i>w</i>                 | >2                   | <i>w</i>                  | <i>N</i>                  | <i>b</i>                  | <i>b</i>        | <i>b</i>     | <i>a</i>       | <i>a</i>                    | <i>a</i>                    | <i>b</i>        | <i>a</i>   | 140                            | 140  | 131  | 145  |
| AGS 2060               | SRW   | <i>w</i>                 | >2                   | <i>w</i>                  | <i>A</i>                  | <i>b</i>                  | <i>b</i>        | <i>a-CS</i>  | <i>b-Nor</i>   | <i>a</i>                    | <i>a</i>                    | <i>a</i>        | <i>a</i>   | 144                            | 140  | 135  | 147  |
| Ambassador             | SWW   | <i>w</i>                 | >2                   | <i>w</i>                  | <i>N</i>                  | <i>b</i>                  | <i>b</i>        | <i>b</i>     | <i>a</i>       | <i>a</i>                    | <i>b</i>                    | <i>a</i>        | <i>b</i>   | 144                            | 141  | 135  | 145  |
| B06*0686               | SRW   | <i>w</i>                 | 2/>2 <i>het</i>      | <i>w</i>                  | <i>N</i>                  | <i>a</i>                  | <i>a.1</i>      | <i>b</i>     | <i>a/b het</i> | <i>a</i>                    | <i>het</i>                  | <i>het</i>      | <i>het</i> | 139                            | 140  | 131  | 142  |
| B08-91993              | SRW   | <i>w</i>                 | >2                   | <i>w</i>                  | <i>N</i>                  | <i>b</i>                  | <i>b</i>        | <i>b</i>     | <i>a</i>       | <i>a</i>                    | <i>a</i>                    | <i>a</i>        | <i>b</i>   | 140                            | 140  | 133  | 143  |
| B09-2950               | SRW   | <i>w</i>                 | >2                   | <i>w</i>                  | <i>N</i>                  | <i>a</i>                  | <i>a.1</i>      | <i>a-CS</i>  | <i>b</i>       | <i>a</i>                    | <i>a</i>                    | <i>b</i>        | <i>a</i>   | 141                            | 140  | 132  | 145  |
| Beck 113               | SRW   | <i>w</i>                 | >2                   | <i>w</i>                  | <i>N</i>                  | <i>b</i>                  | <i>b</i>        | <i>b</i>     | <i>a</i>       | <i>a</i>                    | <i>a</i>                    | <i>a</i>        | <i>b</i>   | 142                            | 140  | 131  | 141  |
| Beck 114               | SRW   | <i>w</i>                 | >2                   | <i>w</i>                  | <i>N</i>                  | <i>b</i>                  | <i>a.1</i>      | <i>b</i>     | <i>b</i>       | <i>a</i>                    | <i>a</i>                    | <i>b</i>        | <i>a</i>   | -                              | 139  | 132  | 143  |
| Beck 120               | SRW   | <i>w</i>                 | >2                   | <i>w</i>                  | <i>N</i>                  | <i>b</i>                  | <i>b</i>        | <i>b</i>     | <i>a</i>       | <i>a</i>                    | <i>a</i>                    | <i>b</i>        | <i>a</i>   | 140                            | 140  | 131  | 144  |
| Beck 123               | SRW   | <i>w</i>                 | >2                   | <i>w</i>                  | <i>N</i>                  | <i>b</i>                  | <i>a.1</i>      | <i>b</i>     | <i>a</i>       | <i>b</i>                    | <i>a</i>                    | <i>b</i>        | <i>a</i>   | -                              | 140  | 132  | 144  |
| Beck 125               | SRW   | <i>w</i>                 | >2                   | <i>w</i>                  | <i>N</i>                  | <i>b</i>                  | <i>b</i>        | <i>null</i>  | <i>a</i>       | <i>a</i>                    | <i>a</i>                    | <i>b</i>        | <i>a</i>   | 143                            | 140  | 134  | 146  |
| Beck 128               | SRW   | <i>w</i>                 | >2                   | <i>w</i>                  | <i>N</i>                  | <i>b</i>                  | <i>b</i>        | <i>b</i>     | <i>a</i>       | <i>a</i>                    | <i>a</i>                    | <i>b</i>        | <i>a</i>   | -                              | 140  | 135  | 145  |
| Beck 129               | SRW   | <i>w</i>                 | >2                   | <i>w</i>                  | <i>N</i>                  | <i>b</i>                  | <i>b</i>        | <i>b</i>     | <i>a</i>       | <i>a</i>                    | <i>a</i>                    | <i>a</i>        | <i>b</i>   | 145                            | 140  | 135  | 146  |

Supplemental Table S1 Continued

| Sample Name     | Class | <i>Vrn</i> loci           |                      | <i>Ppd</i> loci           |                           |                           |            |                       |                    | <i>Eps</i> loci              |                              | <i>Rht</i> loci |            | Heading date (day of the year) |      |      |      |
|-----------------|-------|---------------------------|----------------------|---------------------------|---------------------------|---------------------------|------------|-----------------------|--------------------|------------------------------|------------------------------|-----------------|------------|--------------------------------|------|------|------|
|                 |       | <i>Vrn</i><br>- <i>Al</i> | <i>vrn-Al</i><br>CNV | <i>Vrn</i> -<br><i>B1</i> | <i>vrn</i> -<br><i>B1</i> | <i>vrn</i> -<br><i>D3</i> | <i>Al</i>  | <i>B1</i>             | <i>D1</i>          | <i>TaELF</i><br>3- <i>B1</i> | <i>TaELF</i><br>3- <i>D1</i> | <i>B1</i>       | <i>D1</i>  | 2015                           | 2016 | 2017 | 2018 |
| Beck 88         | SRW   | <i>w</i>                  | >2                   | <i>w</i>                  | <i>N</i>                  | <i>a</i>                  | <i>a.1</i> | <i>b</i>              | <i>b</i>           | <i>a</i>                     | <i>het</i>                   | <i>b</i>        | <i>a</i>   | 139                            | 140  | 129  | 139  |
| Bess            | SRW   | <i>w</i>                  | >2                   | <i>w</i>                  | <i>N</i>                  | <i>a</i>                  | <i>a.1</i> | <i>b</i>              | <i>b</i>           | <i>a</i>                     | <i>b</i>                     | <i>b</i>        | <i>a</i>   | 142                            | 138  | 134  | 144  |
| Branson         | SRW   | <i>w</i>                  | >2                   | <i>w</i>                  | <i>N</i>                  | <i>b</i>                  | <i>a.1</i> | <i>b</i>              | <i>a</i>           | <i>a</i>                     | <i>het</i>                   | <i>b</i>        | <i>a</i>   | 142                            | 140  | 130  | 141  |
| Bromfield       | SRW   | <i>w</i>                  | >2                   | <i>w</i>                  | <i>N</i>                  | <i>b</i>                  | <i>a.1</i> | <i>b</i>              | <i>b</i>           | <i>a</i>                     | <i>a</i>                     | <i>b</i>        | <i>a</i>   | 145                            | 142  | 136  | 147  |
| Caledonia       | SWW   | <i>w</i>                  | >2                   | <i>w</i>                  | <i>N</i>                  | <i>b</i>                  | <i>b</i>   | <i>b</i>              | <i>b</i>           | <i>a</i>                     | <i>a</i>                     | <i>a</i>        | <i>b</i>   | 145                            | 142  | 136  | 147  |
| Charlie         | SRW   | <i>w</i>                  | >2                   | <i>w</i>                  | <i>N</i>                  | <i>b</i>                  | <i>a.1</i> | <i>b</i>              | <i>a</i>           | <i>a</i>                     | <i>a</i>                     | <i>a</i>        | <i>b</i>   | 142                            | 139  | 133  | 146  |
| Coker 9553      | SRW   | <i>w</i>                  | >2                   | <i>w</i>                  | <i>N</i>                  | <i>b</i>                  | <i>b</i>   | <i>b</i>              | <i>a</i>           | <i>a</i>                     | <i>a</i>                     | <i>a</i>        | <i>b</i>   | 140                            | 140  | 131  | 143  |
| Coker 9804      | SRW   | <i>w</i>                  | >2                   | <i>w</i>                  | <i>N</i>                  | <i>b</i>                  | <i>b</i>   | <i>b</i>              | <i>a</i>           | <i>a</i>                     | <i>a</i>                     | <i>a</i>        | <i>b</i>   | 144                            | 140  | 133  | 143  |
| Coker 9835      | SRW   | <i>w</i>                  | >2                   | <i>w</i>                  | <i>het</i>                | <i>b</i>                  | <i>het</i> | <i>a-CS/a-S64 het</i> | <i>a</i>           | <i>a</i>                     | <i>a</i>                     | <i>a</i>        | <i>b</i>   | 143                            | 140  | 134  | 145  |
| Croplan 9101    | SRW   | <i>w</i>                  | 2/>2 <i>het</i>      | <i>w</i>                  | <i>N</i>                  | <i>b</i>                  | <i>a.1</i> | <i>b</i>              | <i>a</i>           | <i>a</i>                     | <i>a</i>                     | <i>b</i>        | <i>a</i>   | 143                            | 140  | 132  | 147  |
| D8006W          | SWW   | <i>w</i>                  | >2                   | <i>w</i>                  | <i>N</i>                  | <i>b</i>                  | <i>b</i>   | <i>b</i>              | <i>a</i>           | <i>a</i>                     | <i>b</i>                     | <i>a</i>        | <i>b</i>   | 143                            | 140  | 133  | 145  |
| Dowell          | SRW   | <i>w</i>                  | >2                   | <i>w</i>                  | <i>N</i>                  | <i>b</i>                  | <i>b</i>   | <i>a-CS</i>           | <i>a</i>           | <i>a</i>                     | <i>a</i>                     | <i>a</i>        | <i>b</i>   | 142                            | 141  | 132  | 145  |
| E6012           | SWW   | <i>w</i>                  | >2                   | <i>w</i>                  | <i>N</i>                  | <i>b</i>                  | <i>het</i> | <i>a-CS</i>           | <i>a/b-Nor het</i> | <i>a</i>                     | <i>het</i>                   | <i>a</i>        | <i>het</i> | 143                            | 139  | 134  | 144  |
| Ernie           | SRW   | <i>w</i>                  | 2                    | <i>w</i>                  | <i>N</i>                  | <i>b</i>                  | <i>a.1</i> | <i>b</i>              | <i>b-Nor</i>       | <i>a</i>                     | <i>a</i>                     | <i>a</i>        | <i>a</i>   | -                              | 139  | 134  | -    |
| Evans           | SRW   | <i>w</i>                  | >2                   | <i>w</i>                  | <i>N</i>                  | <i>b</i>                  | <i>b</i>   | <i>b</i>              | <i>a</i>           | <i>a</i>                     | <i>b</i>                     | <i>a</i>        | <i>b</i>   | -                              | 140  | 135  | 147  |
| F0014           | SWW   | <i>w</i>                  | >2                   | <i>w</i>                  | <i>N</i>                  | <i>b</i>                  | <i>b</i>   | <i>b</i>              | <i>a</i>           | <i>a</i>                     | <i>a</i>                     | <i>a</i>        | <i>b</i>   | 144                            | 141  | 138  | 146  |
| F0039           | SWW   | <i>w</i>                  | >2                   | <i>w</i>                  | <i>N</i>                  | <i>b</i>                  | <i>b</i>   | <i>b</i>              | <i>b</i>           | <i>a</i>                     | <i>a</i>                     | <i>a</i>        | <i>b</i>   | 145                            | 142  | 136  | 147  |
| F0065           | SWW   | <i>w</i>                  | >2                   | <i>w</i>                  | <i>N</i>                  | <i>b</i>                  | <i>b</i>   | <i>b</i>              | <i>a</i>           | <i>het</i>                   | <i>het</i>                   | <i>a</i>        | <i>b</i>   | 144                            | 141  | 136  | 146  |
| Featherstone 73 | SRW   | <i>w</i>                  | >2                   | <i>w</i>                  | <i>N</i>                  | <i>b</i>                  | <i>a.1</i> | <i>b</i>              | <i>b-Nor</i>       | <i>a</i>                     | <i>a</i>                     | <i>a</i>        | <i>b</i>   | 145                            | 140  | 136  | 147  |
| Freedom         | SRW   | <i>w</i>                  | >2                   | <i>w</i>                  | <i>N</i>                  | <i>b</i>                  | <i>a.1</i> | <i>a-CS</i>           | <i>b-Nor</i>       | <i>a</i>                     | <i>a</i>                     | <i>b</i>        | <i>a</i>   | -                              | 142  | 135  | -    |
| Havoc           | SRW   | <i>w</i>                  | >2                   | <i>w</i>                  | <i>N</i>                  | <i>b</i>                  | <i>b</i>   | <i>b</i>              | <i>a</i>           | <i>a</i>                     | <i>a</i>                     | <i>a</i>        | <i>b</i>   | 144                            | 140  | 135  | 146  |
| Heilman         | SRW   | <i>w</i>                  | >2                   | <i>w</i>                  | <i>N</i>                  | <i>b</i>                  | <i>het</i> | <i>b</i>              | <i>a/b het</i>     | <i>a</i>                     | <i>a</i>                     | <i>b</i>        | <i>a</i>   | 142                            | 140  | 132  | 143  |
| Hilliard        | SRW   | <i>w</i>                  | >2                   | <i>w</i>                  | <i>N</i>                  | <i>b</i>                  | <i>het</i> | <i>a-S64</i>          | <i>a</i>           | <i>a</i>                     | <i>a</i>                     | <i>a</i>        | <i>b</i>   | -                              | 139  | 133  | 146  |

Supplemental Table S1 Continued

| Sample Name | Class | <i>Vrn</i> loci           |                      | <i>Ppd</i> loci           |                           |                           |            |              |                              | <i>Eps</i> loci              |                              | <i>Rht</i> loci |            | Heading date (day of the year) |      |      |      |
|-------------|-------|---------------------------|----------------------|---------------------------|---------------------------|---------------------------|------------|--------------|------------------------------|------------------------------|------------------------------|-----------------|------------|--------------------------------|------|------|------|
|             |       | <i>Vrn</i><br>- <i>Al</i> | <i>vrn-Al</i><br>CNV | <i>Vrn</i> -<br><i>B1</i> | <i>vrn</i> -<br><i>B1</i> | <i>vrn</i> -<br><i>D3</i> | <i>Al</i>  | <i>B1</i>    | <i>D1</i>                    | <i>TaELF</i><br>3- <i>B1</i> | <i>TaELF</i><br>3- <i>D1</i> | <i>B1</i>       | <i>D1</i>  | 2015                           | 2016 | 2017 | 2018 |
| Hopewell    | SRW   | <i>w</i>                  | >2                   | <i>w</i>                  | <i>N</i>                  | <i>a</i>                  | <i>b</i>   | <i>a-S64</i> | <i>b</i>                     | <i>a</i>                     | <i>a</i>                     | <i>b</i>        | <i>a</i>   | 144                            | 142  | 136  | 146  |
| Hunker      | SRW   | <i>w</i>                  | >2                   | <i>w</i>                  | <i>N</i>                  | <i>b</i>                  | <i>b</i>   | <i>b</i>     | <i>a</i>                     | <i>a</i>                     | <i>a</i>                     | <i>a</i>        | <i>b</i>   | 144                            | 141  | 136  | 146  |
| Jamestown   | SRW   | <i>w</i>                  | 2                    | <i>w</i>                  | <i>N</i>                  | <i>b</i>                  | <i>a.1</i> | <i>b</i>     | <i>a</i>                     | <i>a</i>                     | <i>b</i>                     | <i>a</i>        | <i>b</i>   | 139                            | 139  | 130  | 144  |
| Jupiter     | SWW   | <i>w</i>                  | >2                   | <i>w</i>                  | <i>N</i>                  | <i>b</i>                  | <i>het</i> | <i>b</i>     | <i>a/b-Nor</i><br><i>het</i> | <i>a</i>                     | <i>het</i>                   | <i>b</i>        | <i>a</i>   | -                              | 141  | 135  | -    |
| Kenton      | SRW   | <i>w</i>                  | >2                   | <i>w</i>                  | <i>N</i>                  | <i>b</i>                  | <i>a.1</i> | <i>b</i>     | <i>b-Nor</i>                 | <i>a</i>                     | <i>b</i>                     | <i>a</i>        | <i>a</i>   | 145                            | 141  | 136  | 146  |
| Key         | SRW   | <i>w</i>                  | >2                   | <i>w</i>                  | <i>N</i>                  | <i>a</i>                  | <i>b</i>   | <i>b</i>     | <i>b-Nor</i>                 | <i>a</i>                     | <i>a</i>                     | <i>a</i>        | <i>a</i>   | 145                            | 142  | 136  | -    |
| Kristy      | SRW   | <i>w</i>                  | >2                   | <i>w</i>                  | <i>null</i>               | <i>b</i>                  | <i>b</i>   | <i>b</i>     | <i>a</i>                     | <i>a</i>                     | <i>a</i>                     | <i>a</i>        | <i>b</i>   | 143                            | 139  | 133  | -    |
| KWS 019     | SWW   | <i>w</i>                  | >2                   | <i>w</i>                  | <i>N</i>                  | <i>b</i>                  | <i>b</i>   | <i>b</i>     | <i>a</i>                     | <i>het</i>                   | <i>a</i>                     | <i>a</i>        | <i>b</i>   | 144                            | 141  | 137  | 148  |
| KWS 023     | SRW   | <i>w</i>                  | >2                   | <i>w</i>                  | <i>N</i>                  | <i>b</i>                  | <i>a.1</i> | <i>b</i>     | <i>a/b het</i>               | <i>a</i>                     | <i>a</i>                     | <i>b</i>        | <i>a</i>   | 144                            | 140  | 137  | 145  |
| KWS 026     | SRW   | <i>w</i>                  | >2                   | <i>w</i>                  | <i>N</i>                  | <i>b</i>                  | <i>a.1</i> | <i>null</i>  | <i>a</i>                     | <i>a</i>                     | <i>b</i>                     | <i>b</i>        | <i>a</i>   | 140                            | 140  | 135  | 145  |
| KWS 028     | SRW   | <i>w</i>                  | >2                   | <i>w</i>                  | <i>N</i>                  | <i>b</i>                  | <i>a.1</i> | <i>b</i>     | <i>b</i>                     | <i>a</i>                     | <i>a</i>                     | <i>b</i>        | <i>a</i>   | 145                            | 142  | 135  | 146  |
| KWS 033     | SWW   | <i>w</i>                  | >2                   | <i>w</i>                  | <i>N</i>                  | <i>b</i>                  | <i>b</i>   | <i>b</i>     | <i>a</i>                     | <i>a</i>                     | <i>b</i>                     | <i>a</i>        | <i>b</i>   | 146                            | 143  | 131  | 149  |
| KWS 034     | SWW   | <i>w</i>                  | >2                   | <i>w</i>                  | <i>N</i>                  | <i>b</i>                  | <i>a.1</i> | <i>b</i>     | <i>b-Nor</i>                 | <i>a</i>                     | <i>b</i>                     | <i>a</i>        | <i>b</i>   | 147                            | 142  | 136  | 149  |
| KWS 036     | SWW   | <i>w</i>                  | >2                   | <i>w</i>                  | <i>N</i>                  | <i>b</i>                  | <i>b</i>   | <i>b</i>     | <i>a/b het</i>               | <i>a</i>                     | <i>het</i>                   | <i>a</i>        | <i>het</i> | 144                            | 141  | 136  | 147  |
| KWS 050     | SRW   | <i>w</i>                  | >2                   | <i>w</i>                  | <i>N</i>                  | <i>b</i>                  | <i>b</i>   | <i>null</i>  | <i>a</i>                     | <i>a</i>                     | <i>a</i>                     | <i>a</i>        | <i>b</i>   | -                              | 141  | 135  | -    |
| KWS 052     | SRW   | <i>w</i>                  | >2                   | <i>w</i>                  | <i>N</i>                  | <i>b</i>                  | <i>b</i>   | <i>b</i>     | <i>a</i>                     | <i>a</i>                     | <i>a</i>                     | <i>a</i>        | <i>b</i>   | -                              | 140  | 133  | -    |
| KWS 053     | SRW   | <i>w</i>                  | >2                   | <i>w</i>                  | <i>N</i>                  | <i>b</i>                  | <i>a.1</i> | <i>a-CS</i>  | <i>b-Nor</i>                 | <i>a</i>                     | <i>b</i>                     | <i>a</i>        | <i>a</i>   | -                              | 139  | 128  | -    |
| L11417      | SRW   | <i>w</i>                  | >2                   | <i>w</i>                  | <i>N</i>                  | <i>a</i>                  | <i>a.1</i> | <i>b</i>     | <i>b</i>                     | <i>a</i>                     | <i>a</i>                     | <i>a</i>        | <i>b</i>   | 141                            | 139  | 132  | 143  |
| L11418      | SRW   | <i>w</i>                  | >2                   | <i>w</i>                  | <i>N</i>                  | <i>a</i>                  | <i>a.1</i> | <i>b</i>     | <i>b-Nor</i>                 | <i>a</i>                     | <i>a</i>                     | <i>a</i>        | <i>b</i>   | 142                            | 140  | 133  | 144  |
| L11419      | SRW   | <i>w</i>                  | >2                   | <i>w</i>                  | <i>N</i>                  | <i>b</i>                  | <i>a.1</i> | <i>b</i>     | <i>b</i>                     | <i>a</i>                     | <i>a</i>                     | <i>b</i>        | <i>a</i>   | 141                            | 140  | 133  | 143  |
| L11420      | SRW   | <i>w</i>                  | >2                   | <i>w</i>                  | <i>N</i>                  | <i>b</i>                  | <i>a.1</i> | <i>b</i>     | <i>b</i>                     | <i>a</i>                     | <i>a</i>                     | <i>b</i>        | <i>a</i>   | 142                            | 139  | 133  | 142  |
| L11421      | SRW   | <i>w</i>                  | >2                   | <i>w</i>                  | <i>N</i>                  | <i>b</i>                  | <i>a.1</i> | <i>a-CS</i>  | <i>b-Nor</i>                 | <i>a</i>                     | <i>b</i>                     | <i>a</i>        | <i>a</i>   | 141                            | 139  | 133  | 142  |

Supplemental Table S1 Continued

|             |       | <i>Vrn</i> loci          |                      |                           |                           |                           | <i>Ppd</i> loci |              |                              | <i>Eps</i> loci             |                             | <i>Rht</i> loci |            | Heading date (day of the year) |      |      |      |
|-------------|-------|--------------------------|----------------------|---------------------------|---------------------------|---------------------------|-----------------|--------------|------------------------------|-----------------------------|-----------------------------|-----------------|------------|--------------------------------|------|------|------|
| Sample Name | Class | <i>Vrn</i><br><i>-Al</i> | <i>vrn-Al</i><br>CNV | <i>Vrn</i> -<br><i>B1</i> | <i>vrn</i> -<br><i>B1</i> | <i>vrn</i> -<br><i>D3</i> | <i>Al</i>       | <i>B1</i>    | <i>D1</i>                    | <i>TaELF</i><br><i>3-B1</i> | <i>TaELF</i><br><i>3-D1</i> | <i>B1</i>       | <i>D1</i>  | 2015                           | 2016 | 2017 | 2018 |
| L11422      | SRW   | <i>w</i>                 | >2                   | <i>w</i>                  | <i>N</i>                  | <i>b</i>                  | <i>a.1</i>      | <i>a-CS</i>  | <i>a/b-Nor</i><br><i>het</i> | <i>a</i>                    | <i>b</i>                    | <i>a</i>        | <i>het</i> | 140                            | 139  | 133  | 142  |
| L11425      | SRW   | <i>w</i>                 | >2                   | <i>w</i>                  | <i>N</i>                  | <i>b</i>                  | <i>b</i>        | <i>b</i>     | <i>a</i>                     | <i>a</i>                    | <i>a</i>                    | <i>b</i>        | <i>a</i>   | 142                            | 140  | 134  | 144  |
| L11428      | SRW   | <i>w</i>                 | >2                   | <i>w</i>                  | <i>N</i>                  | <i>b</i>                  | <i>b</i>        | <i>b</i>     | <i>a</i>                     | <i>a</i>                    | <i>a</i>                    | <i>b</i>        | <i>a</i>   | 142                            | 139  | 133  | 144  |
| L29235      | SRW   | <i>w</i>                 | >2                   | <i>w</i>                  | <i>N</i>                  | <i>b</i>                  | <i>het</i>      | <i>a-S64</i> | <i>b</i>                     | <i>a</i>                    | <i>a</i>                    | <i>b</i>        | <i>a</i>   | 143                            | 140  | 134  | 146  |
| LA754       | SRW   | <i>w</i>                 | 2/>2 <i>het</i>      | <i>w</i>                  | <i>N</i>                  | <i>b</i>                  | <i>het</i>      | <i>b</i>     | <i>a</i>                     | <i>a</i>                    | <i>a</i>                    | <i>a</i>        | <i>b</i>   | 143                            | 140  | 134  | 144  |
| LA841       | SRW   | <i>w</i>                 | 2/>2 <i>het</i>      | <i>w</i>                  | <i>N</i>                  | <i>b</i>                  | <i>a.1</i>      | <i>b</i>     | <i>a</i>                     | <i>a</i>                    | <i>a</i>                    | <i>a</i>        | <i>b</i>   | 142                            | 140  | 132  | 145  |
| LCS News    | SRW   | <i>w</i>                 | >2                   | <i>w</i>                  | <i>null</i>               | <i>b</i>                  | <i>a.1</i>      | <i>null</i>  | <i>b-Nor</i>                 | <i>a</i>                    | <i>b</i>                    | <i>b</i>        | <i>a</i>   | 144                            | 141  | 135  | 146  |
| M09L-9513   | SRW   | <i>w</i>                 | >2                   | <i>w</i>                  | <i>N</i>                  | <i>b</i>                  | <i>het</i>      | <i>b</i>     | <i>a</i>                     | <i>het</i>                  | <i>b</i>                    | <i>b</i>        | <i>a</i>   | 144                            | 140  | 134  | 146  |
| M09L-9547   | SRW   | <i>w</i>                 | >2                   | <i>w</i>                  | <i>N</i>                  | <i>b</i>                  | <i>a.1</i>      | <i>b</i>     | <i>b-Nor</i>                 | <i>a</i>                    | <i>b</i>                    | <i>b</i>        | <i>a</i>   | 142                            | 140  | 135  | 146  |
| M10-1100#   | SRW   | <i>w</i>                 | >2                   | <i>w</i>                  | <i>N</i>                  | <i>b</i>                  | <i>b</i>        | <i>b</i>     | <i>a</i>                     | <i>het</i>                  | <i>a</i>                    | <i>het</i>      | <i>b</i>   | 145                            | 140  | 136  | -    |
| M10-1277    | SRW   | <i>w</i>                 | >2                   | <i>w</i>                  | <i>N</i>                  | <i>b</i>                  | <i>b</i>        | <i>b</i>     | <i>a</i>                     | <i>a</i>                    | <i>a</i>                    | <i>a</i>        | <i>b</i>   | 142                            | 139  | 131  | 141  |
| M11*3144CW  | SRW   | <i>w</i>                 | >2                   | <i>w</i>                  | <i>N</i>                  | <i>b</i>                  | <i>b</i>        | <i>b</i>     | <i>b</i>                     | <i>a</i>                    | <i>a</i>                    | <i>a</i>        | <i>b</i>   | -                              | 142  | 137  | 148  |
| M11-2024#   | SRW   | <i>w</i>                 | >2                   | <i>w</i>                  | <i>N</i>                  | <i>b</i>                  | <i>b</i>        | <i>b</i>     | <i>a</i>                     | <i>a</i>                    | <i>b</i>                    | <i>a</i>        | <i>b</i>   | 139                            | 139  | 131  | -    |
| McCormick   | SRW   | <i>w</i>                 | >2                   | <i>w</i>                  | <i>N</i>                  | <i>b</i>                  | <i>a.1</i>      | <i>b</i>     | <i>b</i>                     | <i>a</i>                    | <i>a</i>                    | <i>a</i>        | <i>b</i>   | 141                            | 140  | 134  | 145  |
| Malabar     | SRW   | <i>w</i>                 | >2                   | <i>w</i>                  | <i>N</i>                  | <i>a</i>                  | <i>b</i>        | <i>b</i>     | <i>b/b-Nor</i><br><i>het</i> | <i>a</i>                    | <i>a</i>                    | <i>b</i>        | <i>a</i>   | 146                            | 142  | 139  | 146  |
| MCIA Venus  | SWW   | <i>w</i>                 | >2                   | <i>w</i>                  | <i>N</i>                  | <i>b</i>                  | <i>b</i>        | <i>b</i>     | <i>a</i>                     | <i>a</i>                    | <i>a</i>                    | <i>a</i>        | <i>b</i>   | 142                            | 139  | 131  | 143  |
| Milton      | SRW   | <i>w</i>                 | >2                   | <i>w</i>                  | <i>N</i>                  | <i>b</i>                  | <i>b</i>        | <i>b</i>     | <i>a</i>                     | <i>a</i>                    | <i>a</i>                    | <i>a</i>        | <i>b</i>   | 143                            | 141  | 134  | 147  |
| Morrin      | SRW   | <i>w</i>                 | >2                   | <i>w</i>                  | <i>N</i>                  | <i>b</i>                  | <i>a.1</i>      | <i>a-S64</i> | <i>b-Nor</i>                 | <i>a</i>                    | <i>a</i>                    | <i>b</i>        | <i>a</i>   | -                              | 141  | 136  | 146  |
| Oakes       | SRW   | <i>w</i>                 | >2                   | <i>w</i>                  | <i>N</i>                  | <i>b</i>                  | <i>het</i>      | <i>a-CS</i>  | <i>a</i>                     | <i>a</i>                    | <i>b</i>                    | <i>a</i>        | <i>b</i>   | 145                            | 140  | 135  | 145  |
| Oasis       | SRW   | <i>w</i>                 | >2                   | <i>w</i>                  | <i>N</i>                  | <i>b</i>                  | <i>b</i>        | <i>a-CS</i>  | <i>b/b-Nor</i><br><i>het</i> | <i>a</i>                    | <i>het</i>                  | <i>a</i>        | <i>a</i>   | 145                            | 142  | 137  | 146  |
| OH02-12686  | SRW   | <i>w</i>                 | >2                   | <i>w</i>                  | <i>N</i>                  | <i>b</i>                  | <i>b</i>        | <i>b</i>     | <i>b</i>                     | <i>a</i>                    | <i>a</i>                    | <i>b</i>        | <i>a</i>   | 148                            | 143  | 140  | 149  |
| OH04-264-58 | SRW   | <i>w</i>                 | >2                   | <i>w</i>                  | <i>N</i>                  | <i>b</i>                  | <i>b</i>        | <i>b</i>     | <i>a</i>                     | <i>a</i>                    | <i>b</i>                    | <i>a</i>        | <i>b</i>   | 147                            | 142  | 135  | 146  |
| Otsego      | SRW   | <i>w</i>                 | >2                   | <i>w</i>                  | <i>N</i>                  | <i>b</i>                  | <i>b</i>        | <i>a-CS</i>  | <i>b</i>                     | <i>a</i>                    | <i>a</i>                    | <i>a</i>        | <i>a</i>   | 144                            | 141  | 136  | 146  |

Supplemental Table S1 Continued

| Sample Name   | Class | <i>Vrn</i> loci           |                      | <i>Ppd</i> loci           |                           |                           |            |             |                              | <i>Eps</i> loci              |                              | <i>Rht</i> loci |            | Heading date (day of the year) |      |      |      |
|---------------|-------|---------------------------|----------------------|---------------------------|---------------------------|---------------------------|------------|-------------|------------------------------|------------------------------|------------------------------|-----------------|------------|--------------------------------|------|------|------|
|               |       | <i>Vrn</i><br>- <i>Al</i> | <i>vrn-Al</i><br>CNV | <i>Vrn</i> -<br><i>B1</i> | <i>vrn</i> -<br><i>B1</i> | <i>vrn</i> -<br><i>D3</i> | <i>Al</i>  | <i>B1</i>   | <i>D1</i>                    | <i>TaELF</i><br>3- <i>B1</i> | <i>TaELF</i><br>3- <i>D1</i> | <i>B1</i>       | <i>D1</i>  | 2015                           | 2016 | 2017 | 2018 |
| Pierson       | SRW   | <i>w</i>                  | >2                   | <i>w</i>                  | <i>N</i>                  | <i>b</i>                  | <i>b</i>   | <i>b</i>    | <i>b</i>                     | <i>a</i>                     | <i>het</i>                   | <i>b</i>        | <i>a</i>   | 142                            | 140  | 136  | 146  |
| Pioneer 25R32 | SRW   | <i>w</i>                  | >2                   | <i>w</i>                  | <i>N</i>                  | <i>b</i>                  | <i>b</i>   | <i>b</i>    | <i>a</i>                     | <i>a</i>                     | <i>a</i>                     | <i>a</i>        | <i>b</i>   | 145                            | 140  | 133  | 146  |
| Pioneer 25R34 | SRW   | <i>w</i>                  | >2                   | <i>w</i>                  | <i>N</i>                  | <i>b</i>                  | <i>b</i>   | <i>b</i>    | <i>a</i>                     | <i>a</i>                     | <i>a</i>                     | <i>a</i>        | <i>b</i>   | 144                            | 140  | 134  | 145  |
| Pioneer 25R39 | SRW   | <i>w</i>                  | >2                   | <i>w</i>                  | <i>N</i>                  | <i>b</i>                  | <i>b</i>   | <i>b</i>    | <i>a</i>                     | <i>a</i>                     | <i>a</i>                     | <i>a</i>        | <i>b</i>   | 143                            | 141  | 136  | 145  |
| Pioneer 25R40 | SRW   | <i>w</i>                  | >2                   | <i>w</i>                  | <i>N</i>                  | <i>b</i>                  | <i>b</i>   | <i>b</i>    | <i>a</i>                     | <i>a</i>                     | <i>a</i>                     | <i>a</i>        | <i>b</i>   | 144                            | 141  | 134  | 146  |
| Pioneer 25R46 | SRW   | <i>w</i>                  | >2                   | <i>w</i>                  | <i>N</i>                  | <i>b</i>                  | <i>b</i>   | <i>a-CS</i> | <i>a</i>                     | <i>a</i>                     | <i>a</i>                     | <i>a</i>        | <i>b</i>   | 144                            | 140  | 134  | 145  |
| Pioneer 25R47 | SRW   | <i>w</i>                  | >2                   | <i>w</i>                  | <i>N</i>                  | <i>b</i>                  | <i>b</i>   | <i>b</i>    | <i>a</i>                     | <i>a</i>                     | <i>a</i>                     | <i>a</i>        | <i>b</i>   | 144                            | 140  | 133  | 144  |
| Pioneer 25R62 | SRW   | <i>w</i>                  | >2                   | <i>w</i>                  | <i>N</i>                  | <i>b</i>                  | <i>a.1</i> | <i>b</i>    | <i>a</i>                     | <i>b</i>                     | <i>a</i>                     | <i>a</i>        | <i>b</i>   | 143                            | 140  | 131  | 145  |
| Pioneer 25R77 | SRW   | <i>w</i>                  | >2                   | <i>w</i>                  | <i>N</i>                  | <i>b</i>                  | <i>het</i> | <i>b</i>    | <i>a</i>                     | <i>a</i>                     | <i>a</i>                     | <i>a</i>        | <i>b</i>   | 143                            | 140  | 131  | 145  |
| Pioneer 25W43 | SWW   | <i>w</i>                  | >2                   | <i>w</i>                  | <i>N</i>                  | <i>b</i>                  | <i>b</i>   | <i>b</i>    | <i>a</i>                     | <i>b</i>                     | <i>a</i>                     | <i>a</i>        | <i>b</i>   | 145                            | 140  | 134  | 145  |
| Pioneer 26R10 | SRW   | <i>w</i>                  | >2                   | <i>w</i>                  | <i>N</i>                  | <i>b</i>                  | <i>b</i>   | <i>b</i>    | <i>a</i>                     | <i>a</i>                     | <i>a</i>                     | <i>a</i>        | <i>b</i>   | 145                            | 140  | 134  | 147  |
| Pioneer 26R53 | SRW   | <i>w</i>                  | >2                   | <i>w</i>                  | <i>N</i>                  | <i>b</i>                  | <i>b</i>   | <i>b</i>    | <i>a</i>                     | <i>a</i>                     | <i>b</i>                     | <i>a</i>        | <i>b</i>   | 143                            | 140  | 133  | 146  |
| Pur 04606     | SRW   | <i>w</i>                  | >2                   | <i>w</i>                  | <i>N</i>                  | <i>a</i>                  | <i>b</i>   | <i>b</i>    | <i>b</i>                     | <i>a</i>                     | <i>b</i>                     | <i>b</i>        | <i>a</i>   | 142                            | 140  | 135  | 146  |
| Pur 05222     | SRW   | <i>w</i>                  | >2                   | <i>w</i>                  | <i>N</i>                  | <i>b</i>                  | <i>het</i> | <i>a-CS</i> | <i>a/b het</i>               | <i>het</i>                   | <i>b</i>                     | <i>b</i>        | <i>a</i>   | 140                            | 140  | 132  | 144  |
| Pur 05247     | SRW   | <i>w</i>                  | >2                   | <i>w</i>                  | <i>N</i>                  | <i>b</i>                  | <i>a.1</i> | <i>b</i>    | <i>a/b het</i>               | <i>a</i>                     | <i>a</i>                     | <i>b</i>        | <i>a</i>   | 145                            | 142  | 137  | 147  |
| Ricochet      | SRW   | <i>w</i>                  | >2                   | <i>w</i>                  | <i>N</i>                  | <i>b</i>                  | <i>a.1</i> | <i>a-CS</i> | <i>a</i>                     | <i>a</i>                     | <i>a</i>                     | <i>a</i>        | <i>b</i>   | 144                            | 141  | 134  | 145  |
| RS907         | SRW   | <i>w</i>                  | >2                   | <i>w</i>                  | <i>N</i>                  | <i>b</i>                  | <i>het</i> | <i>b</i>    | <i>a</i>                     | <i>a</i>                     | <i>b</i>                     | <i>a</i>        | <i>b</i>   | 142                            | 141  | 132  | 145  |
| RS910         | SRW   | <i>w</i>                  | >2                   | <i>w</i>                  | <i>N</i>                  | <i>b</i>                  | <i>b</i>   | <i>b</i>    | <i>a</i>                     | <i>a</i>                     | <i>a</i>                     | <i>b</i>        | <i>a</i>   | 144                            | 140  | 134  | 146  |
| RS935         | SRW   | <i>w</i>                  | >2                   | <i>w</i>                  | <i>N</i>                  | <i>b</i>                  | <i>b</i>   | <i>b</i>    | <i>a</i>                     | <i>a</i>                     | <i>a</i>                     | <i>b</i>        | <i>a</i>   | 141                            | 140  | 131  | 144  |
| RS967         | SRW   | <i>w</i>                  | >2                   | <i>w</i>                  | <i>N</i>                  | <i>b</i>                  | <i>b</i>   | <i>b</i>    | <i>a</i>                     | <i>a</i>                     | <i>b</i>                     | <i>b</i>        | <i>a</i>   | 142                            | 140  | 132  | 144  |
| RS972         | SRW   | <i>w</i>                  | >2                   | <i>w</i>                  | <i>N</i>                  | <i>b</i>                  | <i>b</i>   | <i>b</i>    | <i>a</i>                     | <i>a</i>                     | <i>a</i>                     | <i>a</i>        | <i>b</i>   | 144                            | 140  | 135  | 146  |
| RSxp511       | SRW   | <i>w</i>                  | >2                   | <i>w</i>                  | <i>N</i>                  | <i>b</i>                  | <i>a.1</i> | <i>b</i>    | <i>a</i>                     | <i>a</i>                     | <i>a</i>                     | <i>a</i>        | <i>b</i>   | -                              | 142  | 135  | 146  |
| SC 1315       | SRW   | <i>w</i>                  | >2                   | <i>w</i>                  | <i>N</i>                  | <i>b</i>                  | <i>b</i>   | <i>b</i>    | <i>a</i>                     | <i>a</i>                     | <i>a</i>                     | <i>b</i>        | <i>a</i>   | 141                            | 140  | 130  | 144  |
| Saranac       | SWW   | <i>w</i>                  | >2                   | <i>w</i>                  | <i>N</i>                  | <i>b</i>                  | <i>b</i>   | <i>b</i>    | <i>b/b-Nor</i><br><i>het</i> | <i>a</i>                     | <i>a</i>                     | <i>a</i>        | <i>het</i> | 145                            | 141  | 135  | 145  |

Supplemental Table S1 Continued

| Sample Name           | Class | Vrn loci       |                   |                |               |               | Ppd loci   |                       |                    | Eps loci          |                   | Rht loci  |           | Heading date (day of the year) |      |      |      |
|-----------------------|-------|----------------|-------------------|----------------|---------------|---------------|------------|-----------------------|--------------------|-------------------|-------------------|-----------|-----------|--------------------------------|------|------|------|
|                       |       | Vrn- <i>Al</i> | <i>vrn-Al</i> CNV | Vrn- <i>B1</i> | <i>vrn-B1</i> | <i>vrn-D3</i> | <i>Al</i>  | <i>B1</i>             | <i>D1</i>          | <i>TaELF 3-B1</i> | <i>TaELF 3-D1</i> | <i>B1</i> | <i>D1</i> | 2015                           | 2016 | 2017 | 2018 |
| SC 1325               | SRW   | <i>w</i>       | >2                | <i>w</i>       | <i>N</i>      | <i>b</i>      | <i>a.1</i> | <i>b</i>              | <i>a</i>           | <i>a</i>          | <i>a</i>          | <i>b</i>  | <i>a</i>  | 142                            | 140  | 131  | 142  |
| SC 1335               | SRW   | <i>w</i>       | >2                | <i>w</i>       | <i>N</i>      | <i>b</i>      | <i>b</i>   | <i>b</i>              | <i>a</i>           | <i>a</i>          | <i>a</i>          | <i>b</i>  | <i>a</i>  | 143                            | 140  | 134  | 145  |
| SC-Exp102             | SRW   | <i>w</i>       | >2                | <i>w</i>       | <i>N</i>      | <i>b</i>      | <i>b</i>   | <i>b</i>              | <i>a</i>           | <i>a</i>          | <i>a</i>          | <i>a</i>  | <i>b</i>  | -                              | 140  | 130  | 145  |
| SC-Exp142             | SRW   | <i>w</i>       | >2                | <i>w</i>       | <i>N</i>      | <i>b</i>      | <i>b</i>   | <i>b</i>              | <i>a</i>           | <i>b</i>          | <i>a</i>          | <i>b</i>  | <i>a</i>  | -                              | 140  | 131  | 143  |
| SC 13S26              | SRW   | <i>w</i>       | >2                | <i>w</i>       | <i>N</i>      | <i>b</i>      | <i>b</i>   | <i>b</i>              | <i>a</i>           | <i>a</i>          | <i>a</i>          | <i>b</i>  | <i>a</i>  | -                              | 140  | 134  | 144  |
| Sebree                | SRW   | <i>w</i>       | >2                | <i>w</i>       | <i>N</i>      | <i>a</i>      | <i>het</i> | <i>a-CS</i>           | <i>a/b het</i>     | <i>a</i>          | <i>het</i>        | <i>b</i>  | <i>a</i>  | 139                            | 139  | 127  | 139  |
| Shirley               | SRW   | <i>w</i>       | >2                | <i>w</i>       | <i>N</i>      | <i>b</i>      | <i>a.1</i> | <i>null</i>           | <i>a</i>           | <i>a</i>          | <i>a</i>          | <i>b</i>  | <i>a</i>  | 145                            | 140  | 134  | 147  |
| Sisson                | SRW   | <i>w</i>       | >2                | <i>w</i>       | <i>N</i>      | <i>b</i>      | <i>a.1</i> | <i>a-CS</i>           | <i>b-Nor</i>       | <i>a</i>          | <i>a</i>          | <i>a</i>  | <i>b</i>  | -                              | 140  | 132  | -    |
| Southern Harvest 3200 | SRW   | <i>w</i>       | >2                | <i>w</i>       | <i>N</i>      | <i>b</i>      | <i>a.1</i> | <i>b</i>              | <i>b-Nor</i>       | <i>a</i>          | <i>a</i>          | <i>a</i>  | <i>b</i>  | 143                            | 140  | 136  | 146  |
| SR 5111               | SRW   | <i>w</i>       | >2                | <i>w</i>       | <i>N</i>      | <i>b</i>      | <i>b</i>   | <i>b</i>              | <i>a</i>           | <i>a</i>          | <i>b</i>          | <i>a</i>  | <i>b</i>  | -                              | 139  | 130  | 142  |
| SS 8412               | SRW   | <i>w</i>       | >2                | <i>w</i>       | <i>N</i>      | <i>b</i>      | <i>a.1</i> | <i>b</i>              | <i>b-Nor</i>       | <i>het</i>        | <i>a</i>          | <i>a</i>  | <i>b</i>  | 143                            | 140  | 135  | 147  |
| SS 8415               | SRW   | <i>w</i>       | >2                | <i>w</i>       | <i>N</i>      | <i>b</i>      | <i>b</i>   | <i>b</i>              | <i>a</i>           | <i>a</i>          | <i>a</i>          | <i>a</i>  | <i>b</i>  | 142                            | 140  | 134  | 146  |
| Sunburst              | SRW   | <i>w</i>       | >2                | <i>w</i>       | <i>N</i>      | <i>b</i>      | <i>b</i>   | <i>b</i>              | <i>a</i>           | <i>a</i>          | <i>a</i>          | <i>a</i>  | <i>b</i>  | 145                            | 140  | 135  | 146  |
| SY 100                | SRW   | <i>w</i>       | >2                | <i>w</i>       | <i>N</i>      | <i>b</i>      | <i>b</i>   | <i>b</i>              | <i>a</i>           | <i>a</i>          | <i>a</i>          | <i>a</i>  | <i>b</i>  | -                              | 139  | 135  | 147  |
| SY 474                | SRW   | <i>w</i>       | >2                | <i>w</i>       | <i>N</i>      | <i>b</i>      | <i>het</i> | <i>b</i>              | <i>a/b-Nor het</i> | <i>a</i>          | <i>b</i>          | <i>b</i>  | <i>a</i>  | 144                            | 141  | 135  | 146  |
| SY 483                | SRW   | <i>w</i>       | >2                | <i>w</i>       | <i>N</i>      | <i>b</i>      | <i>b</i>   | <i>b</i>              | <i>a</i>           | <i>a</i>          | <i>a</i>          | <i>b</i>  | <i>a</i>  | 145                            | 142  | 136  | 148  |
| SY Cypress            | SRW   | <i>w</i>       | 2/>2 <i>het</i>   | <i>w</i>       | <i>het</i>    | <i>b</i>      | <i>het</i> | <i>a-CS/a-S64 het</i> | <i>a/b het</i>     | <i>a</i>          | <i>a</i>          | <i>a</i>  | <i>b</i>  | 141                            | 139  | 132  | 144  |
| SY Harrison           | SRW   | <i>w</i>       | >2                | <i>w</i>       | <i>N</i>      | <i>b</i>      | <i>b</i>   | <i>b</i>              | <i>a</i>           | <i>a</i>          | <i>a</i>          | <i>a</i>  | <i>b</i>  | 142                            | 140  | 133  | 146  |
| Terral TV 8861        | SRW   | <i>w</i>       | >2                | <i>w</i>       | <i>N</i>      | <i>b</i>      | <i>b</i>   | <i>b</i>              | <i>a</i>           | <i>a</i>          | <i>a</i>          | <i>a</i>  | <i>b</i>  | 145                            | 141  | 136  | 147  |
| TN 1201               | SRW   | <i>w</i>       | >2                | <i>w</i>       | <i>N</i>      | <i>a</i>      | <i>a.1</i> | <i>b</i>              | <i>b-Nor</i>       | <i>a</i>          | <i>a</i>          | <i>a</i>  | <i>b</i>  | 142                            | 140  | 134  | 145  |
| TN 1202               | SRW   | <i>w</i>       | >2                | <i>w</i>       | <i>het</i>    | <i>b</i>      | <i>a.1</i> | <i>b</i>              | <i>b</i>           | <i>a</i>          | <i>a</i>          | <i>a</i>  | <i>b</i>  | 145                            | 141  | 136  | 147  |
| Tribute               | SRW   | <i>w</i>       | >2                | <i>w</i>       | <i>N</i>      | <i>b</i>      | <i>a.1</i> | <i>b</i>              | <i>b-Nor</i>       | <i>a</i>          | <i>het</i>        | <i>a</i>  | <i>b</i>  | 142                            | 139  | 134  | 145  |
| USG 3201              | SRW   | <i>w</i>       | >2                | <i>w</i>       | <i>N</i>      | <i>b</i>      | <i>b</i>   | <i>b</i>              | <i>a</i>           | <i>a</i>          | <i>a</i>          | <i>a</i>  | <i>b</i>  | 141                            | 139  | 132  | 144  |

Supplemental Table S1 Continued

|                     |       | Vrn loci   |               |            |            |            | Ppd loci |       |         | Eps loci      |               | Rht loci |     | Heading date (day of the year) |      |      |      |
|---------------------|-------|------------|---------------|------------|------------|------------|----------|-------|---------|---------------|---------------|----------|-----|--------------------------------|------|------|------|
| Sample Name         | Class | Vrn<br>-A1 | vrn-A1<br>CNV | Vrn-<br>B1 | vrn-<br>B1 | vrn-<br>D3 | A1       | B1    | D1      | TaELF<br>3-B1 | TaELF<br>3-D1 | B1       | D1  | 2015                           | 2016 | 2017 | 2018 |
| USG 3251            | SRW   | w          | >2            | w          | N          | b          | b        | b     | a       | a             | a             | a        | b   | 143                            | 141  | 134  | 147  |
| USG 3315            | SRW   | w          | >2            | w          | N          | b          | a.1      | b     | a       | a             | b             | a        | b   | 143                            | 139  | 134  | 147  |
| USG 3555            | SRW   | w          | >2            | w          | N          | b          | b        | null  | a       | a             | a             | a        | b   | 144                            | 139  | 133  | 146  |
| VA05W-151           | SRW   | w          | >2            | w          | N          | b          | a.1      | b     | b       | a             | het           | het      | het | 141                            | 140  | 135  | 145  |
| VA05W-251           | SRW   | w          | 1/>2 het      | w          | N          | b          | b        | a-CS  | a       | a             | a             | a        | b   | 145                            | 140  | 136  | 145  |
| VA08MAS-369         | SRW   | w          | 1             | w          | N          | a          | a.1      | b     | b       | a             | a             | a        | b   | 143                            | 139  | 135  | 146  |
| VA10W-119           | SRW   | w          | >2            | w          | N          | b          | b        | b     | a       | a             | a             | a        | b   | 142                            | 139  | 133  | 145  |
| VA10W-96            | SRW   | w          | >2            | w          | N          | b          | a.1      | a-S64 | a       | a             | a             | a        | b   | 138                            | 139  | 127  | 140  |
| VA10W-123           | SRW   | w          | >2            | w          | N          | b          | b        | a-S64 | a       | a             | a             | a        | b   | 139                            | 139  | 131  | 144  |
| VA11W-106           | SRW   | w          | >2            | w          | N          | b          | b        | b     | a       | a             | a             | a        | b   | 146                            | 140  | 134  | 145  |
| VA11W-279           | SRW   | w          | >2            | w          | N          | b          | b        | null  | a       | a             | a             | a        | b   | -                              | 139  | 134  | 145  |
| VA11W-313           | SRW   | w          | >2            | w          | N          | b          | b        | a-S64 | a       | a             | a             | a        | b   | -                              | 139  | 131  | 143  |
| VA12W-72            | SRW   | w          | >2            | w          | N          | b          | b        | a-S64 | a       | a             | a             | a        | b   | -                              | 139  | 131  | 144  |
| Vandal              | SRW   | w          | >2            | w          | N          | b          | b        | b     | a       | a             | a             | a        | b   | 144                            | 141  | 135  | 147  |
| W1104               | SRW   | w          | >2            | w          | N          | b          | b        | b     | a       | b             | a             | b        | a   | 143                            | 141  | 135  | 146  |
| WB-196              | SRW   | w          | >2            | w          | N          | b          | a.1      | b     | b-Nor   | a             | a             | a        | b   | 144                            | 139  | 136  | 147  |
| Yorktown            | SRW   | w          | >2            | w          | N          | b          | het      | a-S64 | a/b het | a             | a             | het      | het | 143                            | 141  | 133  | 144  |
| Korean winter wheat |       |            |               |            |            |            |          |       |         |               |               |          |     |                                |      |      |      |
| Alchan              | HRW   | w          | >2            | w          | N          | b          | b        | b     | a       | a             | a             | a        | b   | -                              | -    | 119  | 134  |
| Anbaek              | HRW   | w          | 1             | w          | N          | b          | b        | b     | a       | a             | a             | a        | a   | -                              | -    | 119  | 134  |
| Baekjoong           | HWW   | w          | 1             | w          | N          | a          | b        | b     | a       | a             | a             | a        | b   | -                              | -    | 116  | 135  |
| Chungkye            | SRW   | w          | 1             | w          | N          | b          | b        | b     | a       | a             | a             | a        | b   | -                              | -    | 119  | 135  |
| Dahong              | SRW   | w          | 1             | w          | N          | b          | b        | a-CS  | a       | a             | a             | a        | b   | -                              | -    | 119  | 134  |
| Dajoong             | HRW   | w          | 1             | w          | N          | b          | b        | b     | a       | a             | a             | a        | a   | -                              | -    | 116  | 135  |



Supplemental Table S1 Continued

|             |       | <i>Vrn</i> loci           |                         |                           |                           |                           | <i>Ppd</i> loci |              |            | <i>Eps</i> loci              |                              | <i>Rht</i> loci |           | Heading date (day of the year) |      |      |      |
|-------------|-------|---------------------------|-------------------------|---------------------------|---------------------------|---------------------------|-----------------|--------------|------------|------------------------------|------------------------------|-----------------|-----------|--------------------------------|------|------|------|
| Sample Name | Class | <i>Vrn</i><br>- <i>Al</i> | <i>vrn-Al</i><br>CNV    | <i>Vrn</i> -<br><i>B1</i> | <i>vrn</i> -<br><i>B1</i> | <i>vrn</i> -<br><i>D3</i> | <i>Al</i>       | <i>B1</i>    | <i>D1</i>  | <i>TaELF</i><br>3- <i>B1</i> | <i>TaELF</i><br>3- <i>D1</i> | <i>B1</i>       | <i>D1</i> | 2015                           | 2016 | 2017 | 2018 |
| Eunpa       | HRW   | <i>w</i>                  | <i>l</i>                | <i>w</i>                  | <i>N</i>                  | <i>a</i>                  | <i>b</i>        | <i>null</i>  | <i>a</i>   | <i>a</i>                     | <i>a</i>                     | <i>a</i>        | <i>b</i>  | -                              | -    | 119  | 135  |
| Geuru       | S/HRW | <i>w</i>                  | <i>l</i> />2 <i>het</i> | <i>w</i>                  | <i>N</i>                  | <i>b</i>                  | <i>b</i>        | <i>a-S64</i> | <i>het</i> | <i>a</i>                     | <i>a</i>                     | <i>het</i>      | <i>b</i>  | -                              | -    | 118  | 135  |
| Gobun       | HRW   | <i>w</i>                  | <i>l</i>                | <i>w</i>                  | <i>N</i>                  | <i>a</i>                  | <i>b</i>        | <i>b</i>     | <i>a</i>   | <i>a</i>                     | <i>a</i>                     | <i>a</i>        | <i>b</i>  | -                              | -    | 117  | 135  |
| Goso        | SRW   | <i>w</i>                  | <i>l</i>                | <i>w</i>                  | <i>N</i>                  | <i>b</i>                  | <i>b</i>        | <i>b</i>     | <i>a</i>   | <i>a</i>                     | <i>a</i>                     | <i>b</i>        | <i>a</i>  | -                              | -    | 116  | 132  |
| Hanbaek     | HWW   | <i>w</i>                  | <i>l</i>                | <i>w</i>                  | <i>N</i>                  | <i>b</i>                  | <i>b</i>        | <i>b</i>     | <i>a</i>   | <i>a</i>                     | <i>a</i>                     | <i>a</i>        | <i>a</i>  | -                              | -    | 118  | 135  |
| Iksan334    | SRW   | <i>w</i>                  | <i>2</i> />2 <i>het</i> | <i>w</i>                  | <i>N</i>                  | <i>a</i>                  | <i>b</i>        | <i>b</i>     | <i>a</i>   | <i>a</i>                     | <i>a</i>                     | <i>b</i>        | <i>a</i>  | -                              | -    | 116  | 132  |
| Jeokjoong   | HWW   | <i>w</i>                  | <i>l</i>                | <i>w</i>                  | <i>N</i>                  | <i>a</i>                  | <i>b</i>        | <i>b</i>     | <i>a</i>   | <i>a</i>                     | <i>a</i>                     | <i>a</i>        | <i>b</i>  | -                              | -    | 114  | 130  |
| Jinpoom     | HRW   | <i>w</i>                  | <i>l</i>                | <i>w</i>                  | <i>N</i>                  | <i>a</i>                  | <i>b</i>        | <i>b</i>     | <i>a</i>   | <i>a</i>                     | <i>a</i>                     | <i>a</i>        | <i>b</i>  | -                              | -    | 118  | 135  |
| Joeun       | HRW   | <i>w</i>                  | <i>l</i>                | <i>w</i>                  | <i>N</i>                  | <i>a</i>                  | <i>b</i>        | <i>b</i>     | <i>a</i>   | <i>a</i>                     | <i>a</i>                     | <i>a</i>        | <i>a</i>  | -                              | -    | 114  | 130  |
| Jokyung     | HWW   | <i>w</i>                  | >2                      | <i>w</i>                  | <i>N</i>                  | <i>a</i>                  | <i>b</i>        | <i>b</i>     | <i>a</i>   | <i>a</i>                     | <i>a</i>                     | <i>b</i>        | <i>a</i>  | -                              | -    | 117  | 132  |
| Jonong      | SRW   | <i>w</i>                  | <i>l</i>                | <i>w</i>                  | <i>N</i>                  | <i>b</i>                  | <i>b</i>        | <i>b</i>     | <i>a</i>   | <i>a</i>                     | <i>a</i>                     | <i>a</i>        | <i>a</i>  | -                              | -    | 113  | 130  |
| Jopoom      | HRW   | <i>w</i>                  | <i>l</i>                | <i>w</i>                  | <i>N</i>                  | <i>b</i>                  | <i>b</i>        | <i>b</i>     | <i>a</i>   | <i>a</i>                     | <i>a</i>                     | <i>a</i>        | <i>a</i>  | -                              | -    | 113  | 130  |
| Keumkang    | HWW   | <i>w</i>                  | <i>l</i>                | <i>w</i>                  | <i>N</i>                  | <i>a</i>                  | <i>b</i>        | <i>b</i>     | <i>a</i>   | <i>a</i>                     | <i>a</i>                     | <i>b</i>        | <i>a</i>  | -                              | -    | 117  | 135  |
| Milsung     | SRW   | <i>w</i>                  | <i>l</i>                | <i>w</i>                  | <i>N</i>                  | <i>b</i>                  | <i>b</i>        | <i>b</i>     | <i>a</i>   | <i>a</i>                     | <i>a</i>                     | <i>b</i>        | <i>a</i>  | -                              | -    | 116  | 132  |
| Namhae      | SRW   | <i>w</i>                  | <i>l</i>                | <i>w</i>                  | <i>N</i>                  | <i>b</i>                  | <i>b</i>        | <i>b</i>     | <i>a</i>   | <i>a</i>                     | <i>a</i>                     | <i>a</i>        | <i>b</i>  | -                              | -    | 116  | 132  |
| Olgeuru     | SRW   | <i>w</i>                  | <i>l</i>                | <i>w</i>                  | <i>N</i>                  | <i>b</i>                  | <i>b</i>        | <i>b</i>     | <i>a</i>   | <i>a</i>                     | <i>a</i>                     | <i>b</i>        | <i>a</i>  | -                              | -    | 116  | 132  |
| Olmil       | SRW   | <i>w</i>                  | <i>l</i>                | <i>w</i>                  | <i>N</i>                  | <i>b</i>                  | <i>b</i>        | <i>a-CS</i>  | <i>a</i>   | <i>a</i>                     | <i>a</i>                     | <i>a</i>        | <i>b</i>  | -                              | -    | 119  | 136  |
| Saeol       | SRW   | <i>w</i>                  | <i>l</i>                | <i>w</i>                  | <i>N</i>                  | <i>a</i>                  | <i>b</i>        | <i>b</i>     | <i>a</i>   | <i>a</i>                     | <i>a</i>                     | <i>b</i>        | <i>a</i>  | -                              | -    | 114  | 130  |
| Seodun      | HRW   | <i>w</i>                  | <i>l</i>                | <i>w</i>                  | <i>N</i>                  | <i>a</i>                  | <i>b</i>        | <i>b</i>     | <i>a</i>   | <i>a</i>                     | <i>a</i>                     | <i>a</i>        | <i>b</i>  | -                              | -    | 118  | 136  |
| Shinmichal  | SRW   | <i>w</i>                  | <i>l</i>                | <i>w</i>                  | <i>N</i>                  | <i>b</i>                  | <i>b</i>        | <i>b</i>     | <i>a</i>   | <i>a</i>                     | <i>a</i>                     | <i>b</i>        | <i>a</i>  | -                              | -    | 119  | 136  |
| Shinmichall | SRW   | <i>w</i>                  | >2                      | <i>w</i>                  | <i>N</i>                  | <i>b</i>                  | <i>b</i>        | <i>b</i>     | <i>a</i>   | <i>a</i>                     | <i>a</i>                     | <i>b</i>        | <i>a</i>  | -                              | -    | 116  | 134  |
| Sooan       | HRW   | <i>w</i>                  | <i>l</i>                | <i>w</i>                  | <i>N</i>                  | <i>a</i>                  | <i>b</i>        | <i>b</i>     | <i>a</i>   | <i>a</i>                     | <i>a</i>                     | <i>a</i>        | <i>a</i>  | -                              | -    | 115  | 130  |
| Sookang     | HRW   | <i>w</i>                  | <i>l</i>                | <i>w</i>                  | <i>N</i>                  | <i>a</i>                  | <i>b</i>        | <i>b</i>     | <i>a</i>   | <i>a</i>                     | <i>a</i>                     | <i>b</i>        | <i>a</i>  | -                              | -    | 117  | 132  |
| Tapdong     | HRW   | <i>w</i>                  | >2                      | <i>w</i>                  | <i>N</i>                  | <i>b</i>                  | <i>b</i>        | <i>b</i>     | <i>a</i>   | <i>a</i>                     | <i>a</i>                     | <i>a</i>        | <i>b</i>  | -                              | -    | 118  | 135  |

Supplemental Table S1 Continued

| Sample Name | Class | <i>Vrn</i> loci           |                      | <i>Ppd</i> loci           |                           |                           |           |           |           | <i>Eps</i> loci              |                              | <i>Rht</i> loci |           | Heading date (day of the year) |      |      |      |
|-------------|-------|---------------------------|----------------------|---------------------------|---------------------------|---------------------------|-----------|-----------|-----------|------------------------------|------------------------------|-----------------|-----------|--------------------------------|------|------|------|
|             |       | <i>Vrn</i><br>- <i>Al</i> | <i>vrn-Al</i><br>CNV | <i>Vrn</i> -<br><i>B1</i> | <i>vrn</i> -<br><i>B1</i> | <i>vrn</i> -<br><i>D3</i> | <i>Al</i> | <i>B1</i> | <i>D1</i> | <i>TaELF</i><br>3- <i>B1</i> | <i>TaELF</i><br>3- <i>D1</i> | <i>B1</i>       | <i>D1</i> | 2015                           | 2016 | 2017 | 2018 |
| Uri         | SRW   | <i>w</i>                  | <i>I</i>             | <i>w</i>                  | <i>N</i>                  | <i>a</i>                  | <i>b</i>  | <i>b</i>  | <i>a</i>  | <i>a</i>                     | <i>a</i>                     | <i>a</i>        | <i>b</i>  | -                              | -    | 116  | 134  |
| Yeonbaek    | HWW   | <i>w</i>                  | <i>I</i>             | <i>w</i>                  | <i>N</i>                  | <i>a</i>                  | <i>b</i>  | <i>b</i>  | <i>a</i>  | <i>a</i>                     | <i>a</i>                     | <i>a</i>        | <i>b</i>  | -                              | -    | 118  | 133  |

SRW, soft red winter; SWW, soft white winter; HRW, hard red winter; HWW, hard white winter.

**Supplemental Table S2.** Analysis of variance of genotype, year and genotype × year for heading date in 121 eastern U.S. soft winetr wheat genotypes

| Source          | Degree of freedom | Type III SS | Mean Square | <i>p</i> value | <i>H</i> <sup>2</sup> |
|-----------------|-------------------|-------------|-------------|----------------|-----------------------|
| Genotype        | 120               | 1052.3      | 8.8         | <0.0001        | 0.86                  |
| Year            | 3                 | 8706.6      | 2902.2      | <0.0001        |                       |
| Genotype × year | 360               | 445.9       | 1.2         | <0.0001        |                       |

Heritability calculated in terms of mean square where  $H^2 = (MS_{\text{Genotype}} - MS_{\text{Genotype} \times \text{Year}}) / MS_{\text{Genotype}}$ .

**Supplemental Table S3.** Correlations between heading dates of 121 eastern U.S. soft winter wheat in different crop years

| Heading date | 2015    | 2016    | 2017    |
|--------------|---------|---------|---------|
| 2016         | 0.62*** |         |         |
| 2017         | 0.73*** | 0.52*** |         |
| 2018         | 0.72*** | 0.57*** | 0.73*** |

\*\*\* $p < 0.0001$

**Supplemental Table S4.** Influences of crop year and the vernalization (*Vrn*), photoperiod (*Ppd*), earliness *per se* (*Eps*) and reduced-height (*Rht*) genes on variations in the heading date of 30 Korean winter wheat varieties observed in two crop years.

| Source of variation | Degrees of freedom | Mean square | Proportion of total variance (%) | Proportion of genetic variance (%) |
|---------------------|--------------------|-------------|----------------------------------|------------------------------------|
| Crop year           | 1                  | 4100.3***   | 94.7                             |                                    |
| <i>Vrn-A1</i>       | 1                  | 2.8         | 0.1                              | 3.9                                |
| <i>Vrn-B1</i>       | 0                  | 0.0         | 0.0                              | 0.0                                |
| <i>Vrn-D3</i>       | 1                  | 9.5         | 0.2                              | 13.7                               |
| <i>Ppd-A1</i>       | 0                  | 0.0         | 0.0                              | 0.0                                |
| <i>Ppd-B1</i>       | 2                  | 4.7         | 0.2                              | 13.4                               |
| <i>Ppd-D1</i>       | 0                  | 0.0         | 0.0                              | 0.0                                |
| <i>Eps-B1</i>       | 0                  | 0.0         | 0.0                              | 0.0                                |
| <i>Eps-D1</i>       | 0                  | 0.0         | 0.0                              | 0.0                                |
| <i>Rht-B1</i>       | 1                  | 3.9         | 0.1                              | 5.6                                |
| <i>Rht-D1</i>       | 1                  | 44.3***     | 1.0                              | 63.4                               |
| Error               | 52                 | 3.0         | 3.6                              |                                    |

The sum of squares was used to calculate the proportion of total variance contributed by crop years and each gene, and the proportion of genetic variance by each gene.

\*\*\* significant at  $p < 0.001$ .

**Supplemental Table S5.** Contributions of vernalization (*Vrn*), photoperiod (*Ppd*), earliness *per se* (*Eps*) and reduced-height (*Rht*) genes, and their interactions, to the heading date of 86 eastern U.S. soft winter wheat genotypes in each of four crop years

| Source of variation  | Degrees of freedom | 2015        |                                  | 2016        |                                  | 2017        |                                  | 2018        |                                  |
|----------------------|--------------------|-------------|----------------------------------|-------------|----------------------------------|-------------|----------------------------------|-------------|----------------------------------|
|                      |                    | Mean Square | Proportion of total variance (%) | Mean Square | Proportion of total variance (%) | Mean Square | Proportion of total variance (%) | Mean Square | Proportion of total variance (%) |
| <i>Vrn-A1</i>        | 2                  | 3.5         | 2.3                              | 0.8         | 2.2                              | 1.8         | 1.2                              | 0.3         | 0.2                              |
| <i>Vrn-B1</i>        | 2                  | 0.5         | 0.3                              | 0.7         | 2.0                              | 0.2         | 0.2                              | 0.2         | 0.1                              |
| <i>Vrn-D3</i>        | 1                  | 11.9*       | 4.0                              | 5.9**       | 8.0                              | 6.3         | 2.0                              | 6.8         | 2.7                              |
| <i>Ppd-A1</i>        | 1                  | 9.0         | 3.0                              | 2.4         | 3.3                              | 0.5         | 0.1                              | 2.6         | 1.0                              |
| <i>Ppd-B1</i>        | 3                  | 6.1         | 6.1                              | 0.1         | 0.4                              | 6.4         | 6.0                              | 3.6         | 4.3                              |
| <i>Ppd-D1</i>        | 2                  | 13.9*       | 9.2                              | 3.6**       | 9.8                              | 37.5***     | 23.5                             | 13.6**      | 10.8                             |
| <i>Eps-B1</i>        | 1                  | 5.1         | 1.7                              | 0.9         | 1.3                              | 0.6         | 0.2                              | 0.7         | 0.3                              |
| <i>Eps-D1</i>        | 1                  | 5.4         | 1.8                              | 2.3         | 3.2                              | 1.6         | 0.5                              | 7.2         | 2.9                              |
| <i>Rht-B1</i>        | 1                  | 9.7         | 3.2                              | 0.2         | 0.2                              | 0.0         | 0.0                              | 0.9         | 0.4                              |
| <i>Rht-D1</i>        | 1                  | 0.1         | 0.0                              | 0.1         | 0.1                              | 6.5         | 2.0                              | 0.0         | 0.0                              |
| <i>Ppd-B1*Ppd-D1</i> | 4                  | 5.6         | 7.5                              | 1.5         | 8.1                              | 5.6         | 7.0                              | 9.4**       | 15.0                             |
| <i>Ppd-B1*Vrn-D3</i> | 1                  | 0.5         | 0.2                              | 0.8         | 1.2                              | 0.3         | 0.1                              | 0.3         | 0.1                              |
| <i>Ppd-D1*Vrn-D3</i> | 1                  | 0.5         | 0.2                              | 5.8**       | 7.8                              | 0.3         | 0.1                              | 0.3         | 0.1                              |
| Error                | 64                 | 2.9         | 60.7                             | 0.6         | 52.4                             | 2.8         | 57.1                             | 2.4         | 62.0                             |

Eighty-six eastern US. soft winter wheat varieties with homozygous alleles at each gene were evaluated for four crop years and were included in the model. The sum of squares was used to calculate the proportion of total variance contributed by each gene.

\*\*\* significant at  $p < 0.001$ , \*\* significant at  $p < 0.01$ , \* significant at  $p < 0.05$ .

**Supplemental Table S6.** Contributions of vernalization (*Vrn*), photoperiod (*Ppd*), earliness *per se* (*Eps*) and reduced-height (*Rht*) genes to the heading date of 30 Korean winter wheat varieties in each of two crop years.

| Source of variation | Degrees of freedom | 2017        |                                  | 2018        |                                  |
|---------------------|--------------------|-------------|----------------------------------|-------------|----------------------------------|
|                     |                    | Mean Square | Proportion of total variance (%) | Mean Square | Proportion of total variance (%) |
| <i>Vrn-A1</i>       | 1                  | 2.4         | 2.3                              | 0.7         | 0.5                              |
| <i>Vrn-B1</i>       | 0                  | 0.0         | 0.0                              | 0.0         | 0.0                              |
| <i>Vrn-D3</i>       | 1                  | 4.2         | 4.1                              | 5.4         | 4.3                              |
| <i>Ppd-A1</i>       | 0                  | 0.0         | 0.0                              | 0.0         | 0.0                              |
| <i>Ppd-B1</i>       | 2                  | 3.9         | 7.6                              | 1.2         | 1.9                              |
| <i>Ppd-D1</i>       | 0                  | 0.0         | 0.0                              | 0.0         | 0.0                              |
| <i>Eps-B1</i>       | 0                  | 0.0         | 0.0                              | 0.0         | 0.0                              |
| <i>Eps-D1</i>       | 0                  | 0.0         | 0.0                              | 0.0         | 0.0                              |
| <i>Rht-B1</i>       | 1                  | 1.1         | 1.1                              | 3.1         | 2.4                              |
| <i>Rht-D1</i>       | 1                  | 21.4*       | 21.0                             | 22.9*       | 18.2                             |
| Error               | 23                 | 2.8         | 63.8                             | 4.0         | 72.7                             |

The sum of squares was used to calculate the proportion of total variance contributed by each gene.

\* significant at  $p < 0.05$ .

**Supplemental Table S7.** Primer sequences of KASP markers used in this study

| Gene          | Allele                              | Marker ID     | Primer name       | Primer sequence (5'-3')          |
|---------------|-------------------------------------|---------------|-------------------|----------------------------------|
| <i>Vrn-A1</i> | <i>Vrn-A1a</i>                      | wMAS000033    | Vrn-A1_9K0001_AL2 | GAGTTTTCCAAAAAGATAGATCAATGTAAAC  |
|               |                                     |               | Vrn-A1_9K0001_AL1 | AGAGTTTTCCAAAAAGATAGATCAATGTAAAT |
|               |                                     |               | Vrn-A1_9K0001_C1  | GTTAGTAGTGATGGTCCAATAATGCCAAA    |
|               | <i>Vrn-A1b</i>                      | wMAS000035    | Vrn-A1b-Marq_AL2  | GTTTTGGCCTGGCCATCCTCA            |
|               |                                     |               | Vrn-A1b-Marq_AL1  | GTTTTGGCCTGGCCATCCTCC            |
|               |                                     |               | Vrn-A1b-Marq_C1   | TATCAGGTGGTTGGGTGAGGACGT         |
|               | <i>vrn-A1</i> , CNV <sup>a</sup> >2 | vrn-A1exon4   | Vrn-A1_Exon4_F1   | AGGCATCTCATGGGAGAGGATC           |
|               |                                     |               | Vrn-A1_Exon4_F2   | CAGGCATCTCATGGGAGAGGATT          |
|               |                                     |               | Vrn-A1_Exon4_R    | CCAGTTGCTGCAACTCCTTGAGATT        |
|               | <i>vrn-A1</i> , CNV=2               | vrn-A1exon7   | Vrn-A1_Exon7_F1   | TGAGTTTGATCTTGCTGCGCCG           |
|               | <i>vrn-A1</i> , CNV=1               | vrn-A1exon7   | Vrn-A1_Exon7_F2   | CTGAGTTTGATCTTGCTGCGCCA          |
|               |                                     |               | Vrn-A1_Exon4_R    | CTTCCCCACAGCTCGTGGAGAA           |
| <i>Vrn-B1</i> | <i>Vrn-B1a</i>                      | Vrn-B1_I_D    | Vrn-B1_D_A2       | GGCAGCTAATGTGGGGTAGTCT           |
|               |                                     |               | Vrn-B1_D_C1s      | ATTCGTATTGCTAGCTCCGGCCAT         |
|               |                                     |               | Vrn-B1_I_ALG      | CAACCTCCACGGTTTCAAAAAGTAG        |
|               |                                     |               | Vrn-B1_I_C1       | ATATTTACTAAGCAGCGGTCATTCCGAT     |
|               | <i>Vrn-B1b</i>                      | wMAS000037    | Vrn-B1_B_ALC      | GCGCAAGCGGGAGCTACATC             |
|               |                                     |               | Vrn-B1_B_ALG      | TGCGCAAGCGGGAGCTACATG            |
|               |                                     |               | Vrn-B1_B_C1       | GCCATGAACAACAAAGGGGTGGT          |
|               | <i>Vrn-B1c</i>                      | Vrn-B1_C      | Vrn-B1_C_ALT      | CCTAAACAGGGGCAGAACACTA           |
|               |                                     |               | Vrn-B1_C_ALG      | CCTAAACAGGGGCAGAACACTG           |
|               |                                     |               | Vrn-B1_C_C        | GACCCAGGGCCTATGAATGTAATT         |
|               | <i>vrn-B1-Neuse</i>                 | TaVrn-B1_1752 | TaVrnB1_1752_AF2  | GGAATGACCGCTGCTTAGTAAATATA       |
|               | <i>vrn-B1-AGS2000</i>               | TaVrn-B1_1752 | TaVrnB1_1752_CF1  | GGAATGACCGCTGCTTAGTAAATATC       |



|               |                               |                     |                                                |                                                                                                        |
|---------------|-------------------------------|---------------------|------------------------------------------------|--------------------------------------------------------------------------------------------------------|
| <i>Vrn-D3</i> | <i>vrn-D3a</i>                | VRN-D3-F6/VRN-D3-R8 | TaVrnB1_1752_R<br>VRN-D3-F6                    | GATTTAGCACCTCAACATACAGGTCT<br>CTTCTATTACATGTTTCGTTTCATG                                                |
|               | <i>vrn-D3b</i>                | VRN-D3-F6/VRN-D3-R8 | VRN-D3-R8                                      | ACGAGCACGAAGCGATGGATCGC                                                                                |
| <i>Ppd-A1</i> | <i>Ppd-A1a.1</i>              | Ppd-A1prodel        | Ppd-A1prodel_AL2                               | GCGGCGAGCCGGTTAATCG                                                                                    |
|               | <i>Ppd-A1b</i>                | Ppd-A1prodel        | Ppd-A1prodel_AL1<br>Ppd-A1prodel_C1            | TTTCGGTGTTTGACTTCAGGCG<br>GTGGCGTACTCCCTCCGTTTCTT                                                      |
| <i>Ppd-B1</i> | <i>Ppd-B1a-Chinese Spring</i> | wMAS000027          | TaPpdBJ001tR                                   | GACGTTATGAACGCTTGGCA                                                                                   |
|               |                               |                     | TaPpdBJ001iR                                   | CCGTTTTTCGCGGCCTT                                                                                      |
|               | <i>Ppd-B1a-Sonora 64</i>      | TaPpdBJ003          | TaPpdBJ001tF<br>TaPpdBJ003F<br>TaPpdBJ003R     | GGGTTCGTCGGGAGCTGT<br>CGTGAAGAGCTAGCGATGAACA<br>TGGGCACGTAAACACACCTT                                   |
|               | <i>Ppd-B1b</i>                | wMAS000027          | TaPpdBJ001tR<br>TaPpdBJ001iR<br>TaPpdBJ001tF   | GACGTTATGAACGCTTGGCA<br>CCGTTTTTCGCGGCCTT<br>GGGTTCGTCGGGAGCTGT                                        |
| <i>Ppd-D1</i> | <i>Ppd-D1a</i>                | wMAS000024          | TaPpdDD001RI                                   | CAAGGAAGTATGAGCAGCGGT                                                                                  |
|               | <i>Ppd-D1b</i>                | wMAS000024          | TaPpdDD001RD<br>TaPpdDD001FL                   | AAGAGGAAACATGTTGGGGTCC<br>GCCTCCCCTACTACACTGGGC                                                        |
|               | <i>Ppd-D1b-Norstar</i>        | TaPpdDD002          | TaPpdDD002FL<br>TaPpdDD002RI<br>TaPpdDD002RD   | GGTCTCCAATCAAGGCGGT<br>AAGGTGACCAAGTTCATGCTCGAGCAGCTCCCGACG<br>GAAGGTTCGGAGTCAACGGATTGGGCGAGCAGCTCCAAC |
|               |                               |                     | TaPpdDD002RD                                   | CCCTTGCAGCTCGCT                                                                                        |
| <i>Eps-B1</i> | <i>TaELF3-B1a</i>             | TaELF3-B1 Kasp      | aELF3-B1_Kasp_F                                | CCCTTGCAGCTCGCC                                                                                        |
|               | <i>TaELF3-B1b</i>             | TaELF3-B1 Kasp      | TaELF3-B1 Kasp_V<br>TaELF3-B1<br>Kasp2_generic | CGACCCAACACTCACG                                                                                       |

|               |                   |                 |                         |                       |
|---------------|-------------------|-----------------|-------------------------|-----------------------|
| <i>Eps-D1</i> | <i>TaELF3-D1a</i> | TaELF3-D1 Kasp2 | TaELF3-D1_Kasp2_F       | GCCTCAGAATCAGTGGCTT   |
|               | <i>TaELF3-D1b</i> | TaELF3-D1 Kasp2 | TaELF3-D1_Kasp2_V       | GCCTCAGAATCAGTGGCTC   |
|               |                   |                 | TaELF3-D1_Kasp2_generic | GTAGACGAACCCTTCCGA    |
| <i>Rht-B1</i> | <i>Rht-B1a</i>    | wMAS000001      | RhtB1_SNP-AL1           | CCCATGGCCATCTCSAGCTG  |
|               | <i>Rht-B1b</i>    | wMAS000001      | RhtB1_SNP-AL2           | CCCATGGCCATCTCSAGCTA  |
|               |                   |                 | RhtB1_SNP-C             | TCGGGTACAAGGTGCGGGCG  |
| <i>Rht-D1</i> | <i>Rht-D1a</i>    | wMAS000002      | RhtD1_AL1               | CATGGCCATCTCGAGCTRCTC |
|               | <i>Rht-D1b</i>    | wMAS000002      | RhtD1_AL2               | CATGGCCATCTCGAGCTRCTA |
|               |                   |                 | RhtD1_C1                | CGGGTACAAGGTGCGCGCC   |

<sup>a</sup> CNV, copy number variation.

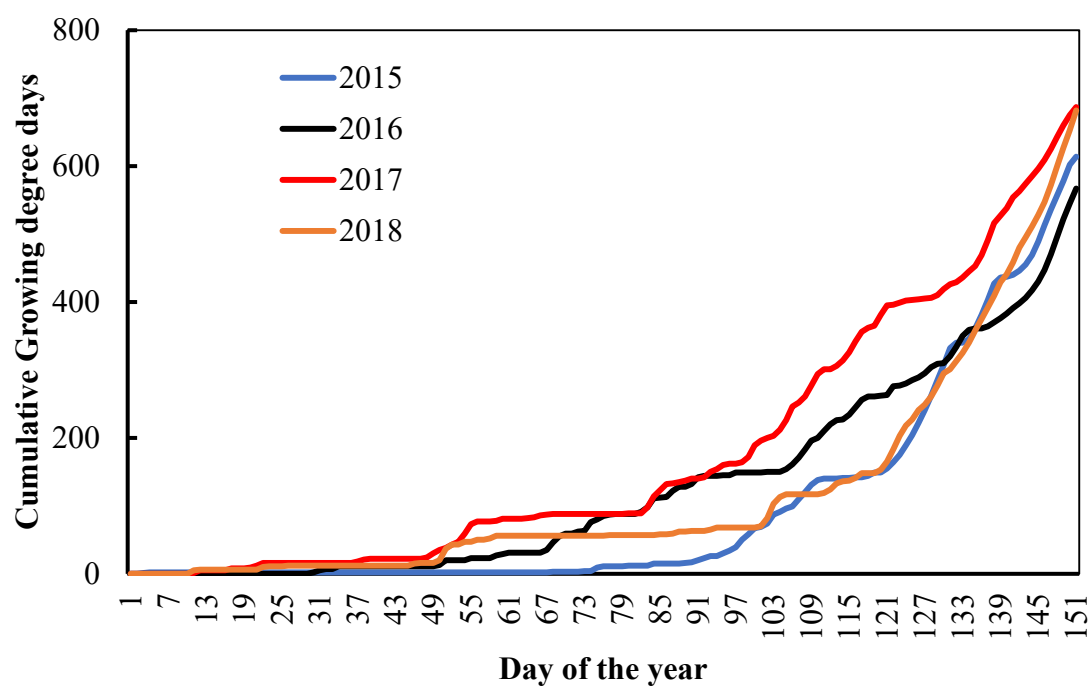

**Supplemental Fig S1.** Cumulative growing degree days from January 1st to May 31st in Wooster, Ohio, in 2015-2018. Growing degree days = mean daily temperature - 50°F.

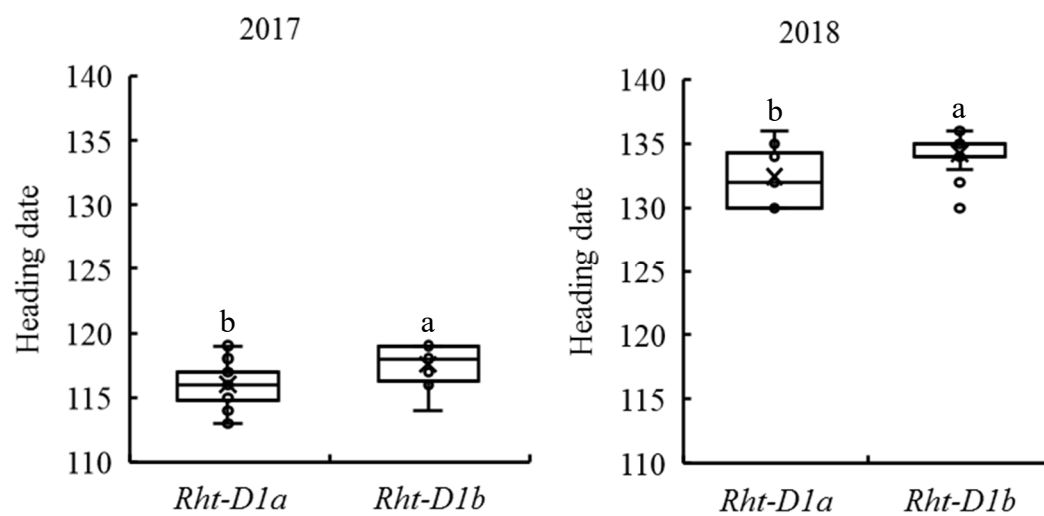

**Supplemental Fig. S2.** Heading dates of 30 Korean winter wheat varieties with different alleles at the *Rht-D1* gene grown in Wooster, Ohio, in two different years. x indicates the mean. Means with different letters are significantly different at the 0.05 probability level.
